# Supplementary material for: Isolation of Anti-Diabetic Active Compounds from Benincasae Exocarpium and Development of Simultaneous Analysis by HPLC-PDA
Source: MDPI journal article supplement (doi:10.3390/molecules27010009), 2021-12-21
Supplement: s1 [file s1]

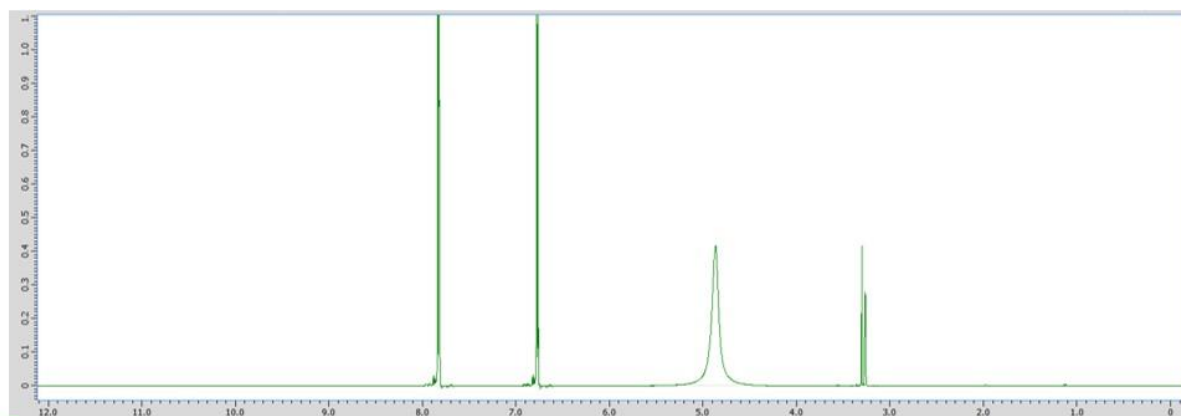

**Figure S1.**  $^1\text{H}$ -NMR (600MHz,  $\text{CD}_3\text{OD}-d_4$ ) spectrum of compound **1**

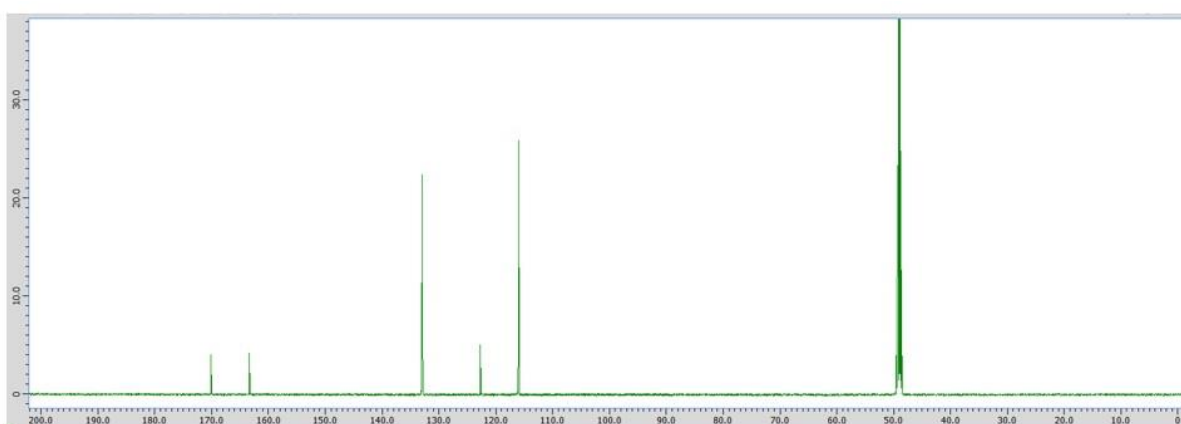

**Figure S2.**  $^{13}\text{C}$ -NMR (150MHz,  $\text{CD}_3\text{OD}-d_4$ ) spectrum of compound **1**

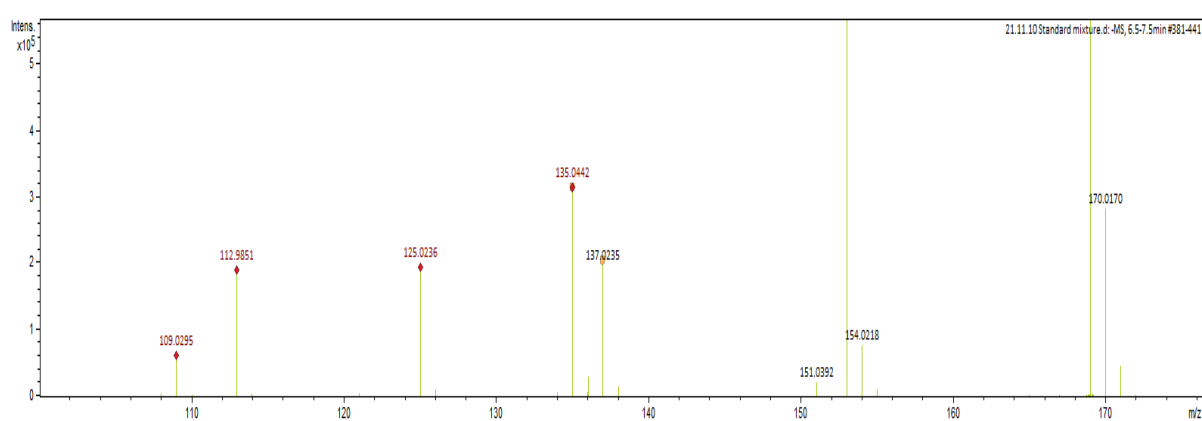

**Figure S3.** ESI/LTQ-Orbitrap-HRMS spectrum of compound **1** (negative mode)

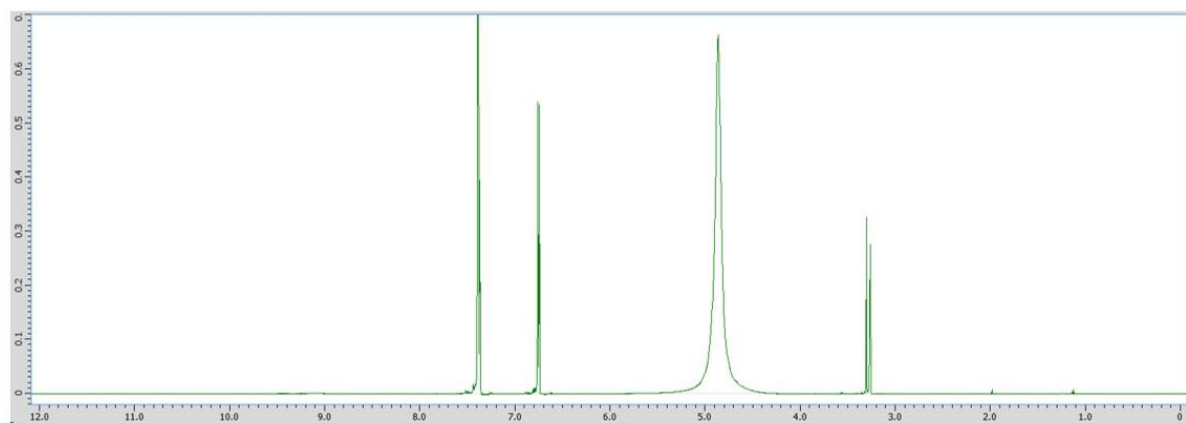

**Figure S4.** <sup>1</sup>H-NMR (600MHz, CD<sub>3</sub>OD-*d*<sub>4</sub>) spectrum of compound 2

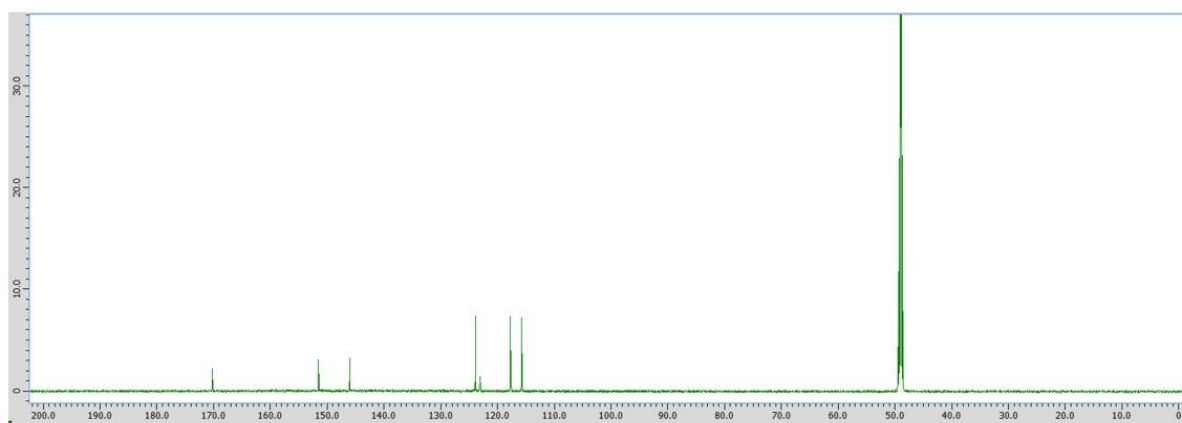

**Figure S5.** <sup>13</sup>C-NMR (150MHz, CD<sub>3</sub>OD-*d*<sub>4</sub>) spectrum of compound 2

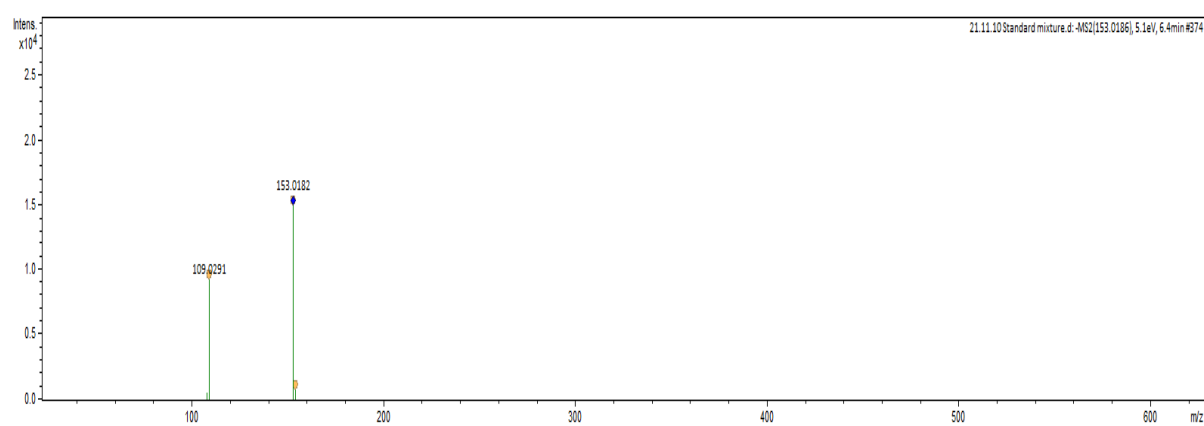

**Figure S6.** ESI/LTQ-Orbitrap-HRMS spectrum of compound 2 (negative mode)

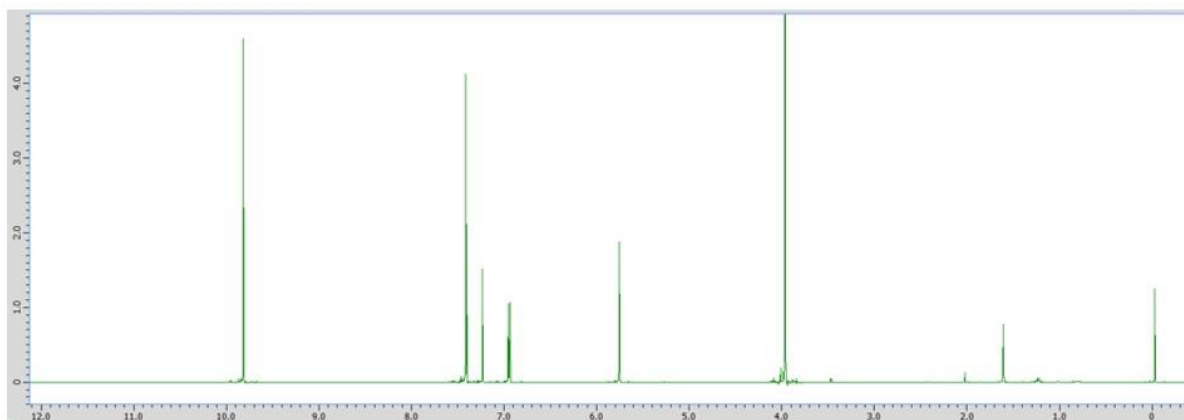

**Figure S7.**  $^1\text{H}$ -NMR (600MHz,  $\text{CDCl}_3$ -*d*) spectrum of compound **3**

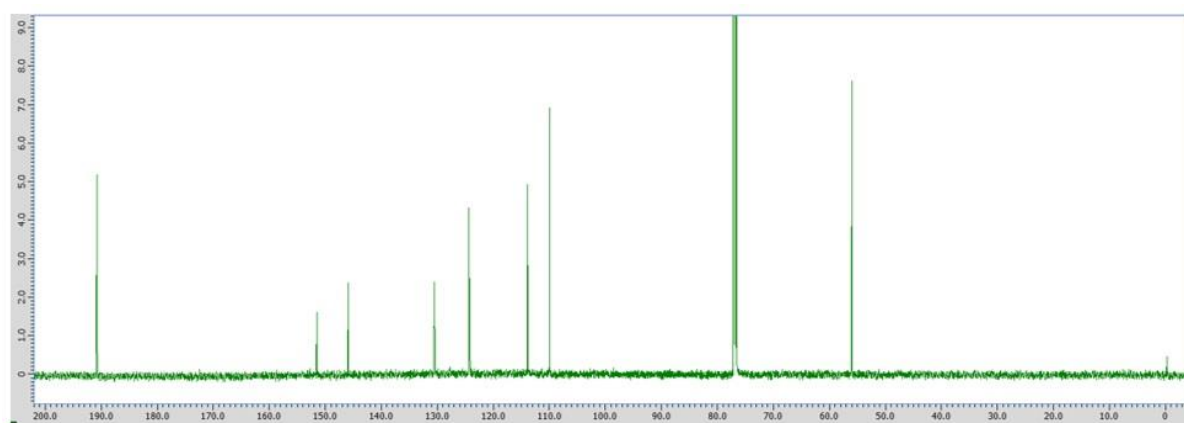

**Figure S8.**  $^{13}\text{C}$ -NMR (150MHz,  $\text{CDCl}_3$ -*d*) spectrum of compound **3**

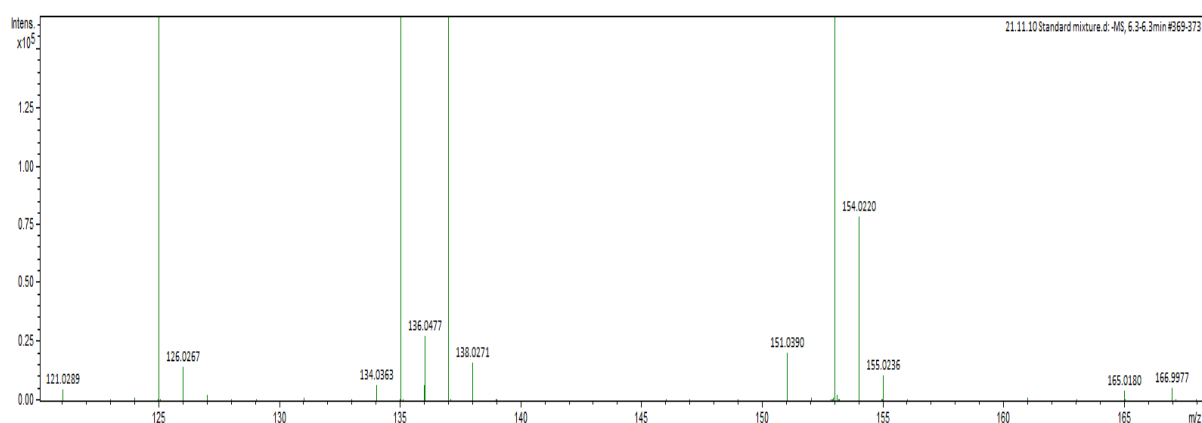

**Figure S9.** ESI/LTQ-Orbitrap-HRMS spectrum of compound **3** (negative mode)

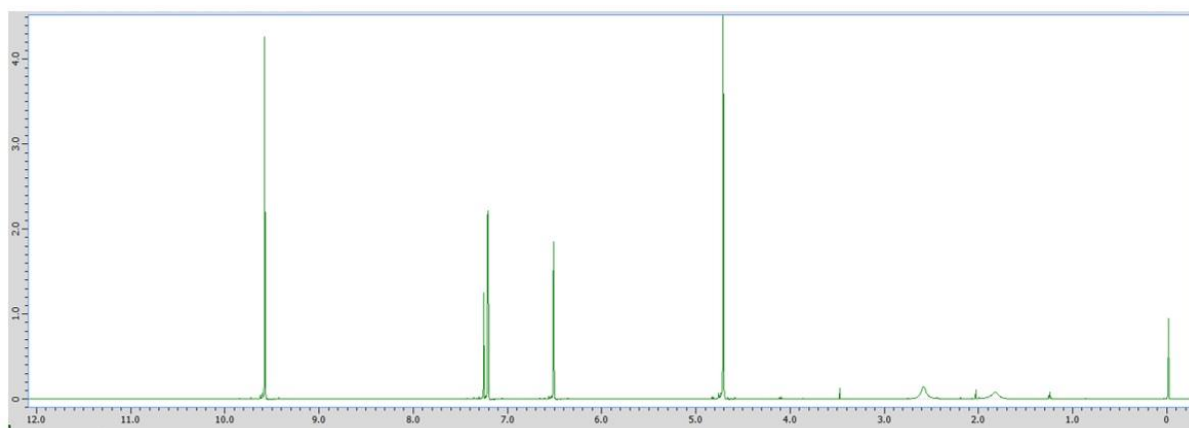

**Figure S10.**  $^1\text{H}$ -NMR (600MHz,  $\text{CDCl}_3$ -*d*) spectrum of compound **4**

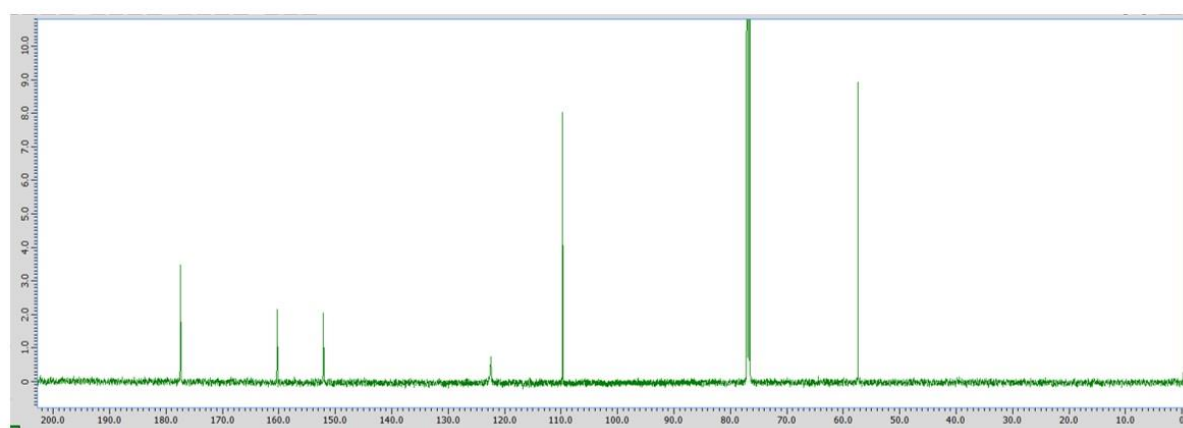

**Figure S11.**  $^{13}\text{C}$ -NMR (150MHz,  $\text{CDCl}_3$ -*d*) spectrum of compound **4**

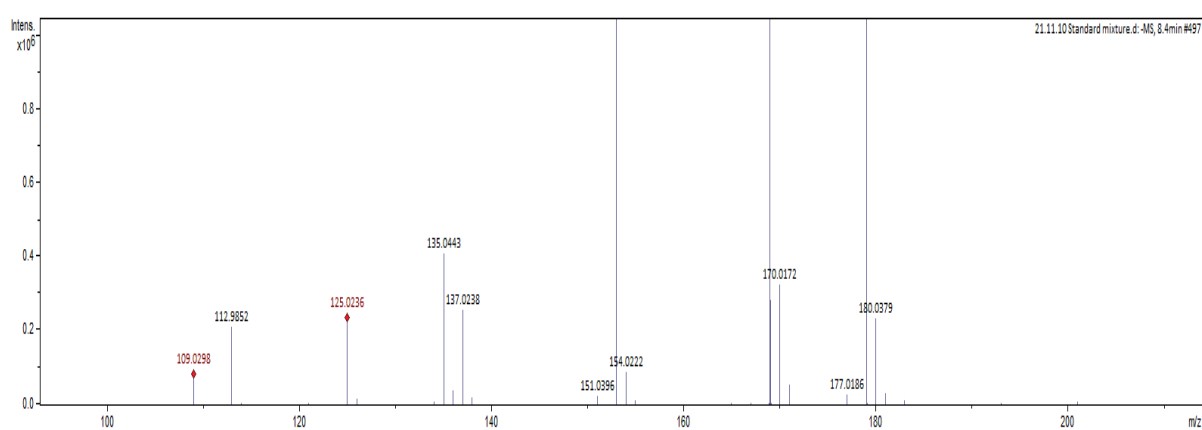

**Figure S12.** ESI/LTQ-Orbitrap-HRMS spectrum of compound **4** (negative mode)

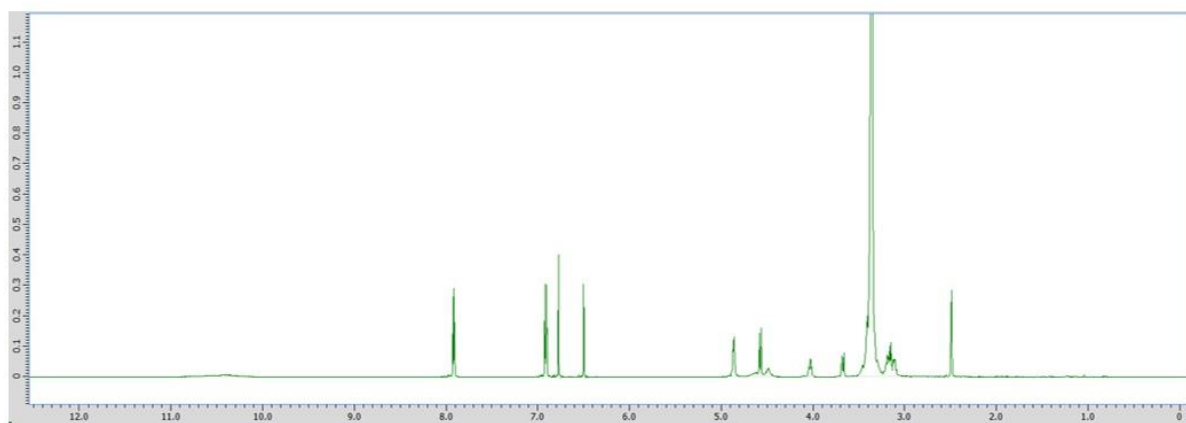

**Figure S13.**  $^1\text{H}$ -NMR (600MHz,  $\text{DMSO-}d_6$ ) spectrum of compound **5**

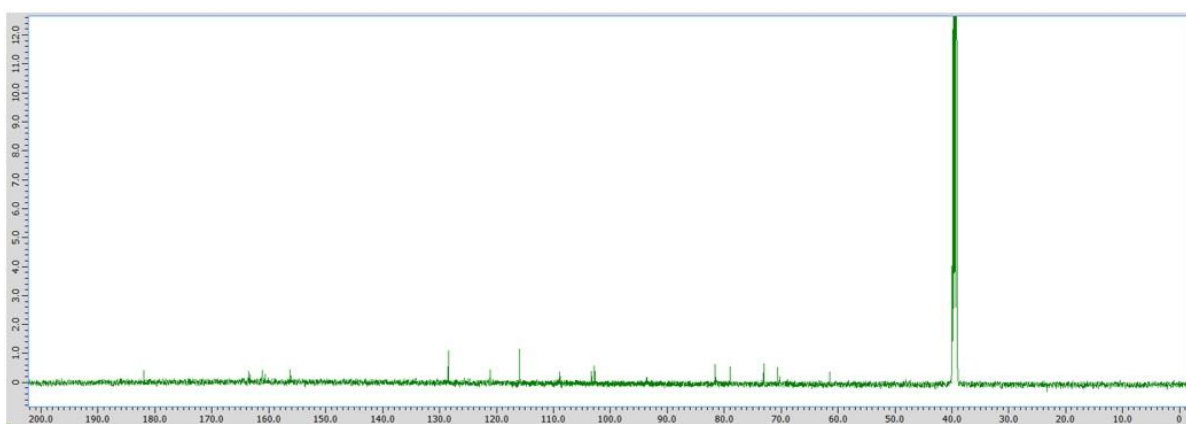

**Figure S14.**  $^{13}\text{C}$ -NMR (150MHz,  $\text{DMSO-}d_6$ ) spectrum of compound **5**

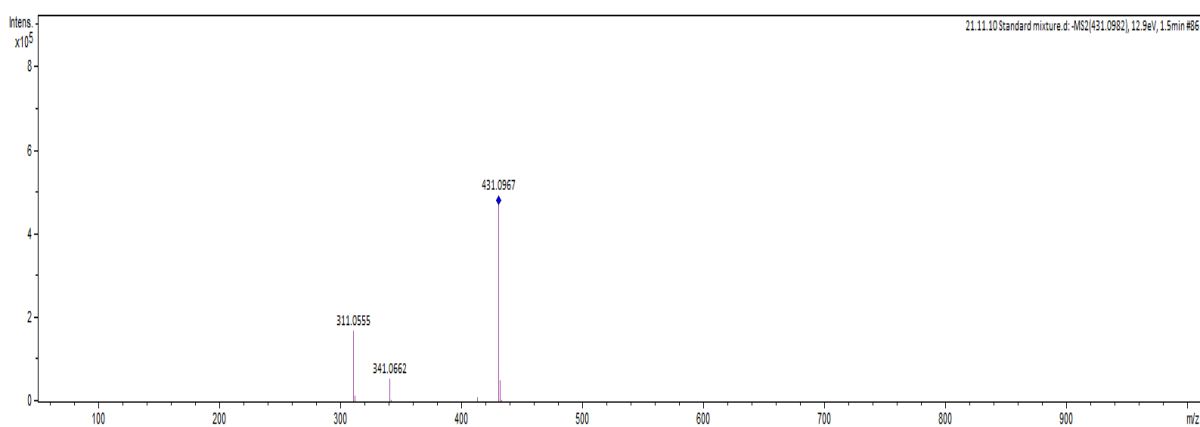

**Figure S15.** ESI/LTQ-Orbitrap-HRMS spectrum of compound **5** (negative mode)

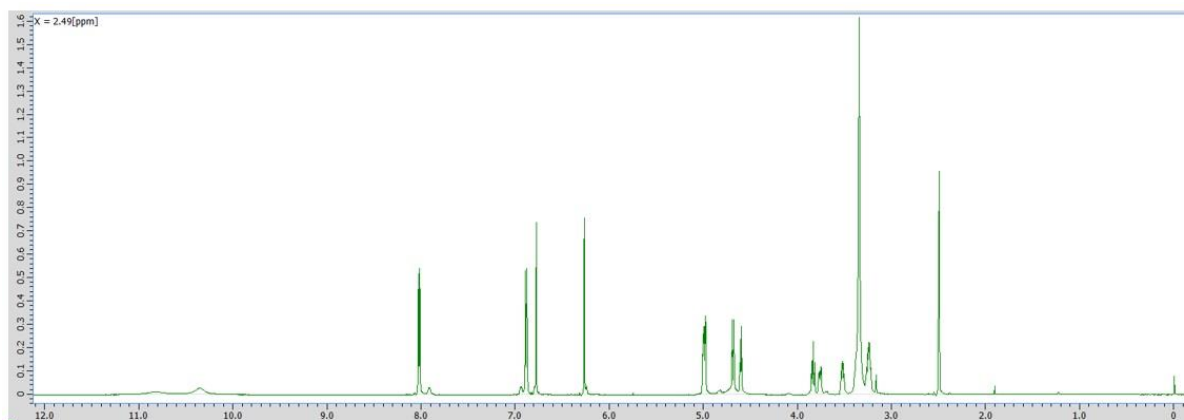

**Figure S16.**  $^1\text{H}$ -NMR (600MHz,  $\text{DMSO}-d_6$ ) spectrum of compound **6**

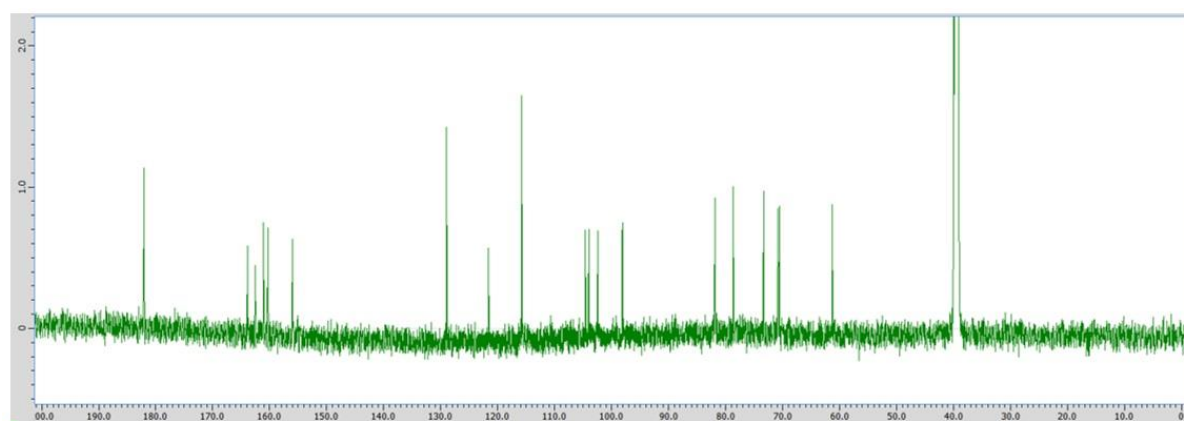

**Figure S17.**  $^{13}\text{C}$ -NMR (150MHz,  $\text{DMSO}-d_6$ ) spectrum of compound **6**

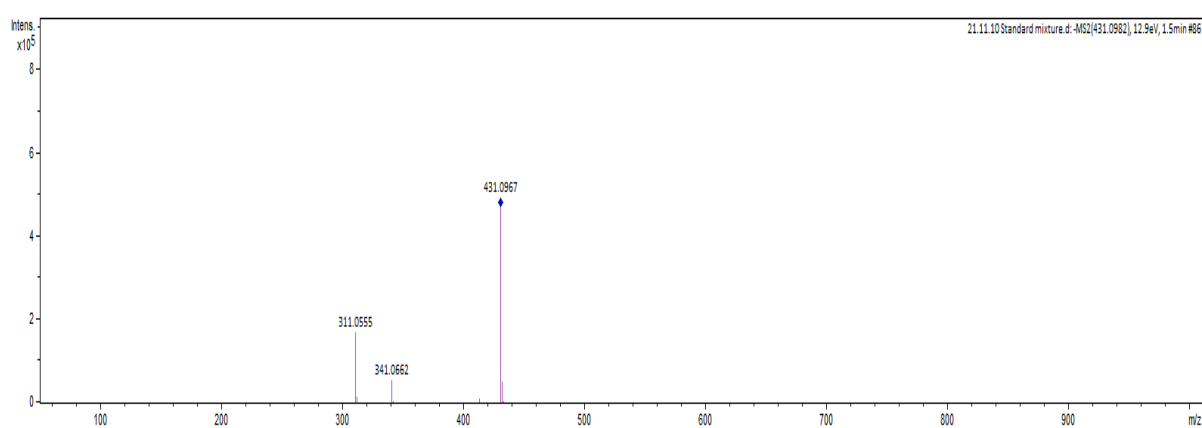

**Figure S18.** ESI/LTQ-Orbitrap-HRMS spectrum of compound **6** (negative mode)

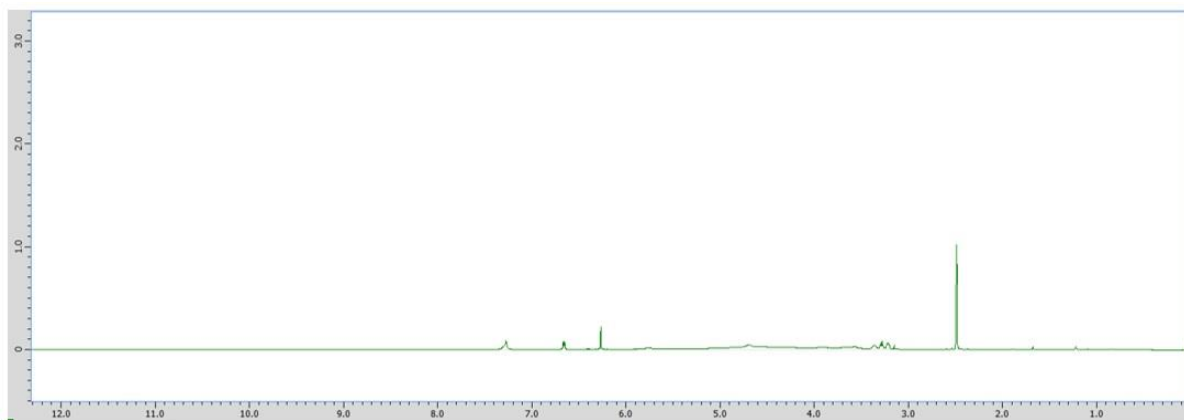

**Figure S19.**  $^1\text{H}$ -NMR (600MHz,  $\text{DMSO}-d_6$ ) spectrum of compound 7

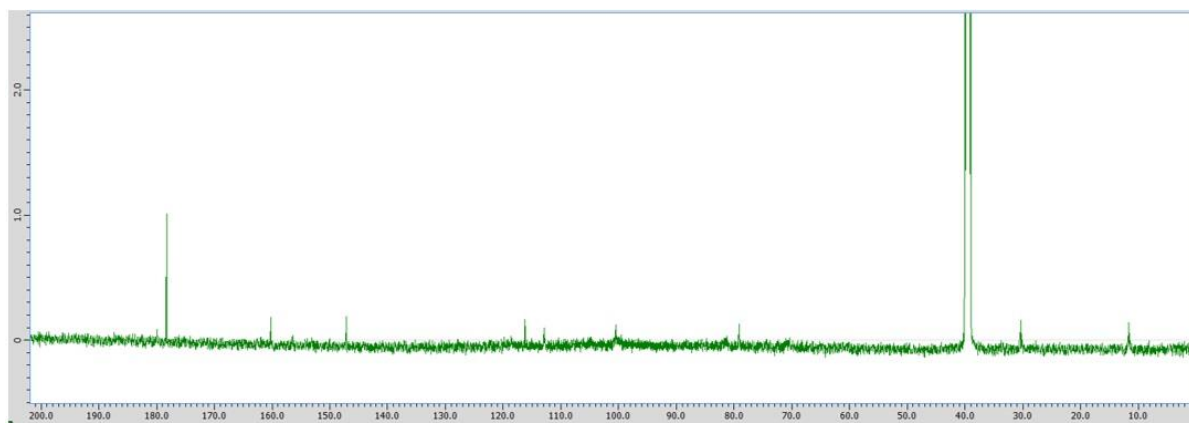

**Figure S20.**  $^{13}\text{C}$ -NMR (150MHz,  $\text{DMSO}-d_6$ ) spectrum of compound 7

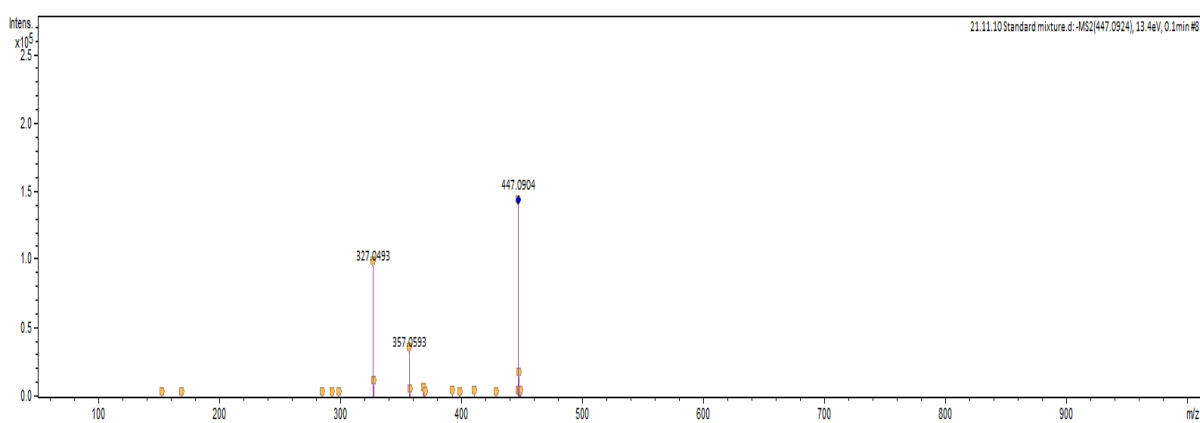

**Figure S21.** ESI/LTQ-Orbitrap-HRMS spectrum of compound 7 (negative mode)

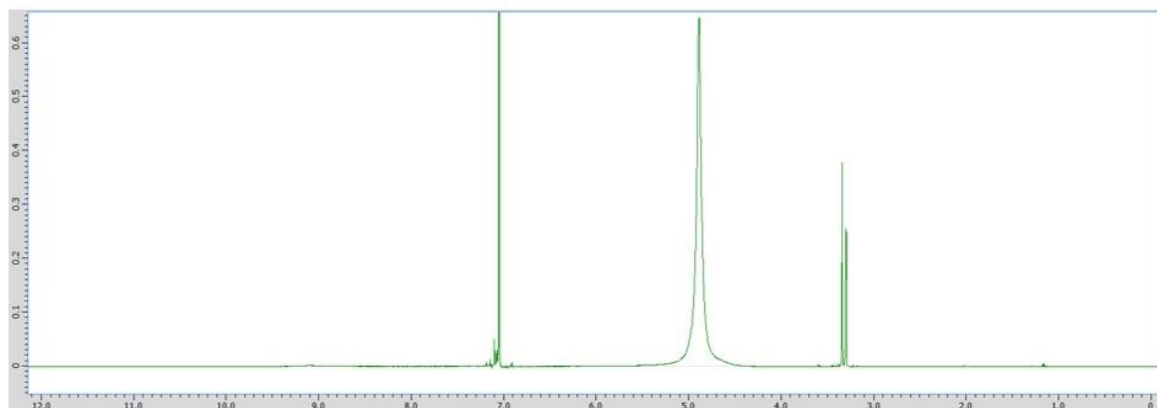

**Figure S22.** <sup>1</sup>H-NMR (600MHz, CD<sub>3</sub>OD-*d*<sub>4</sub>) spectrum of compound 8

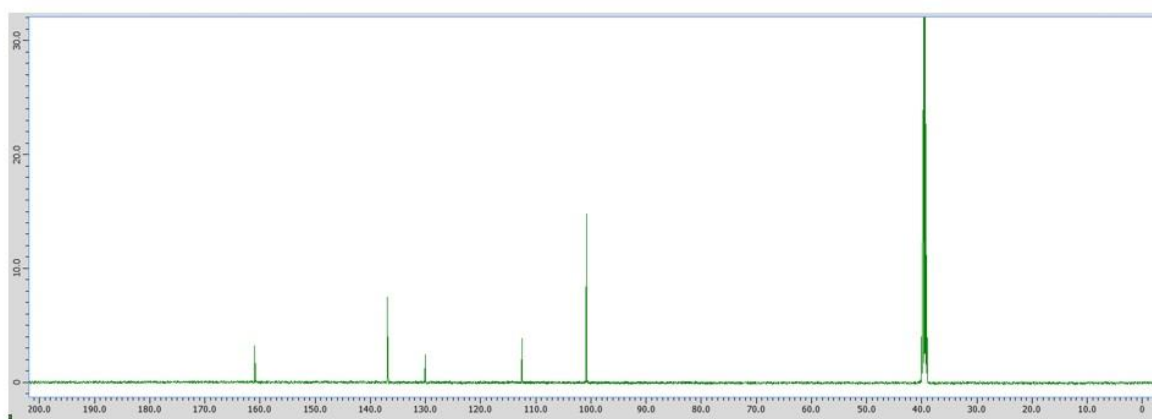

**Figure S23.** <sup>13</sup>C-NMR (150MHz, CD<sub>3</sub>OD-*d*<sub>4</sub>) spectrum of compound 8

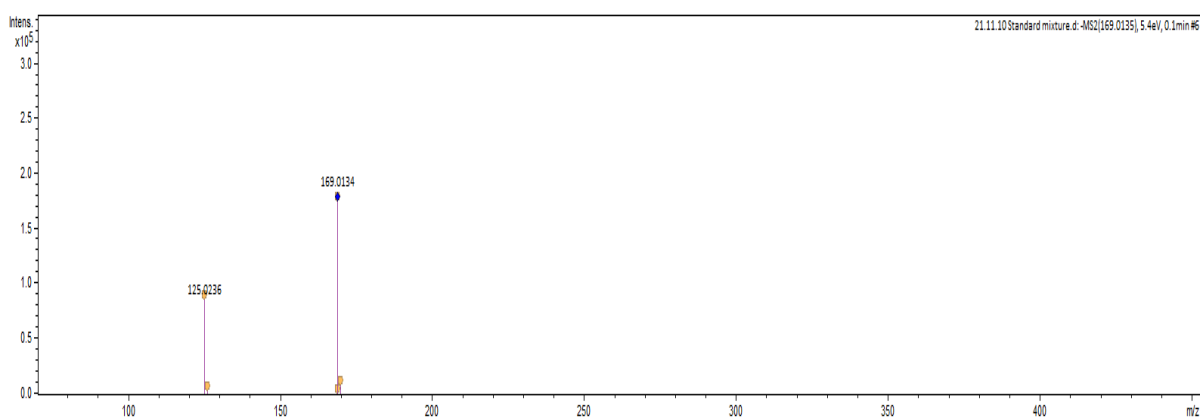

**Figure S24.** ESI/LTQ-Orbitrap-HRMS spectrum of compound 8 (negative mode)

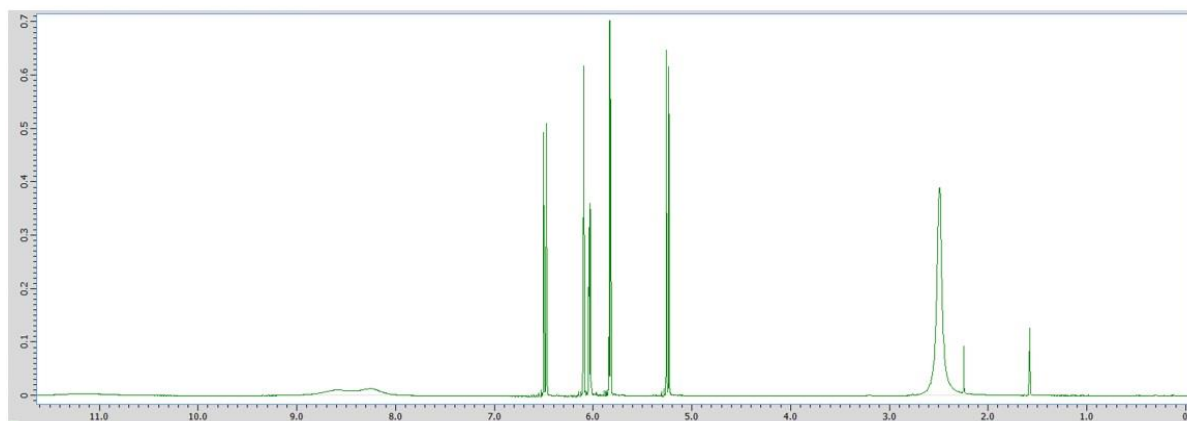

**Figure S25.**  $^1\text{H}$ -NMR (600MHz,  $\text{DMSO-}d_6$ ) spectrum of compound **9**

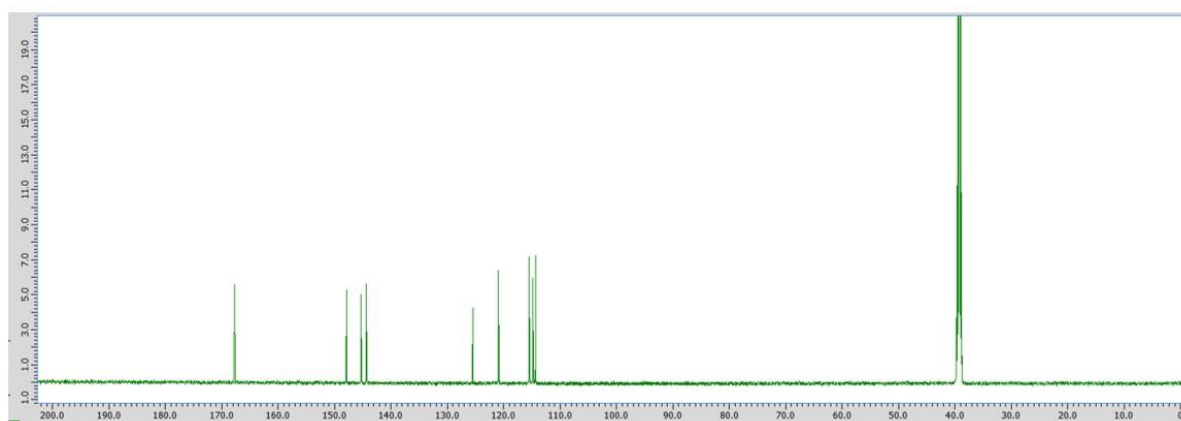

**Figure S26.**  $^{13}\text{C}$ -NMR (150MHz,  $\text{DMSO-}d_6$ ) spectrum of compound **9**

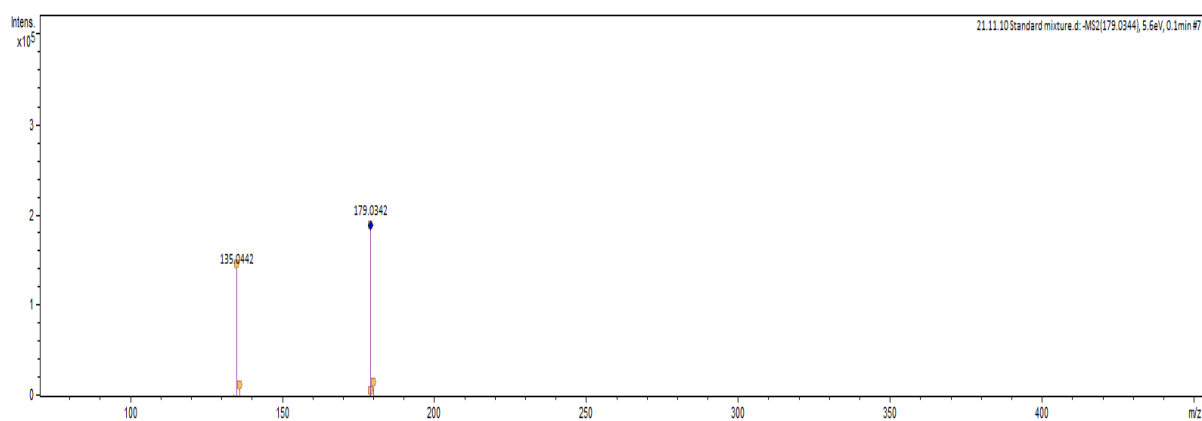

**Figure S27.** ESI/LTQ-Orbitrap-HRMS spectrum of compound **9** (negative mode)

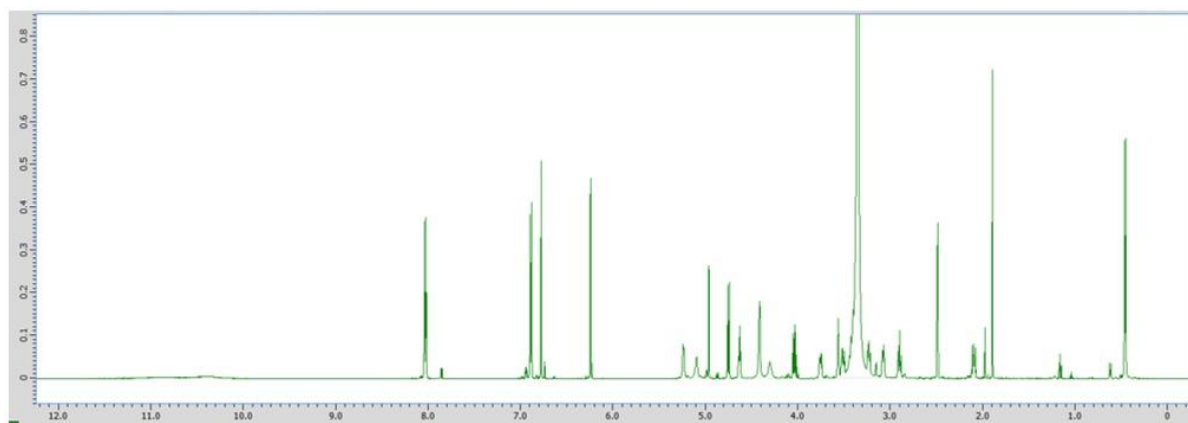

**Figure S28.**  $^1\text{H}$ -NMR (600MHz,  $\text{DMSO}-d_6$ ) spectrum of compound **10**

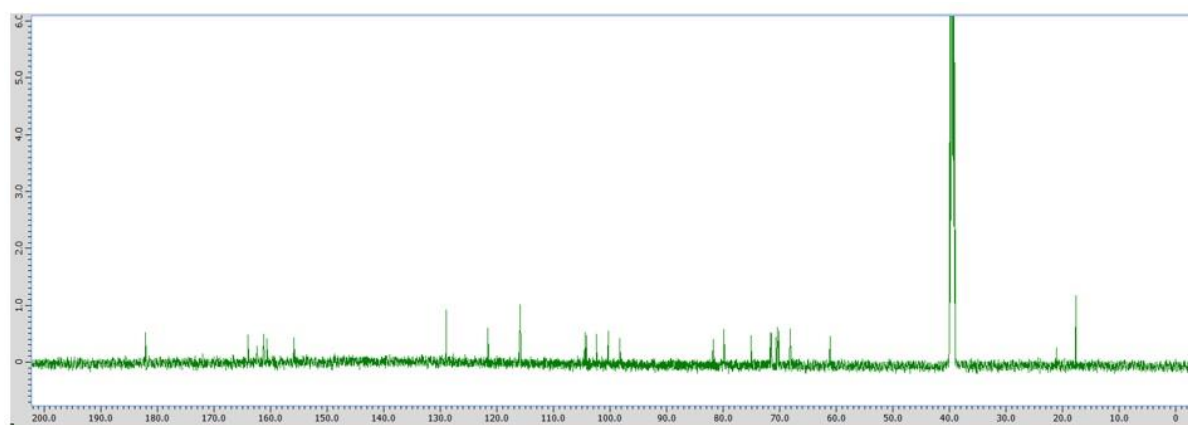

**Figure S29.**  $^{13}\text{C}$ -NMR (150MHz,  $\text{DMSO}-d_6$ ) spectrum of compound **10**

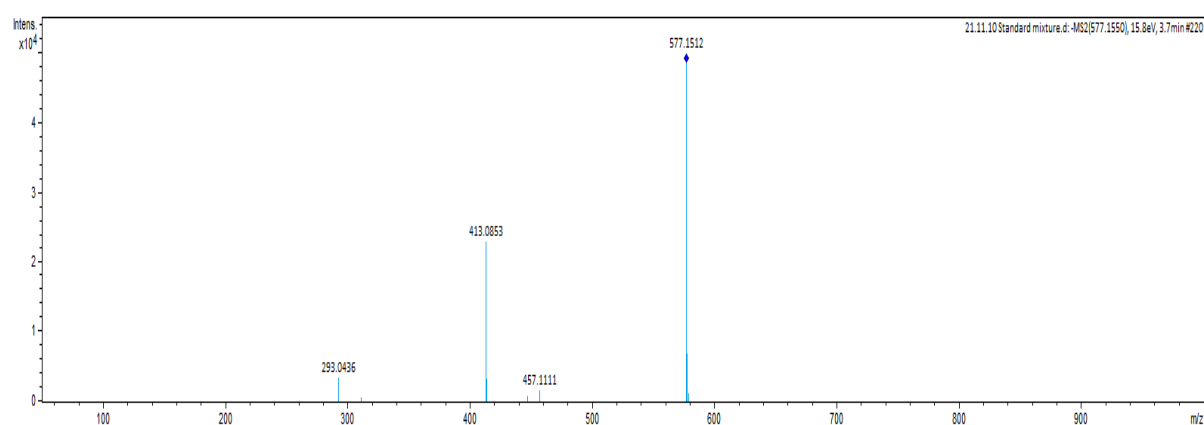

**Figure S30.** ESI/LTQ-Orbitrap-HRMS spectrum of compound **10** (negative mode)

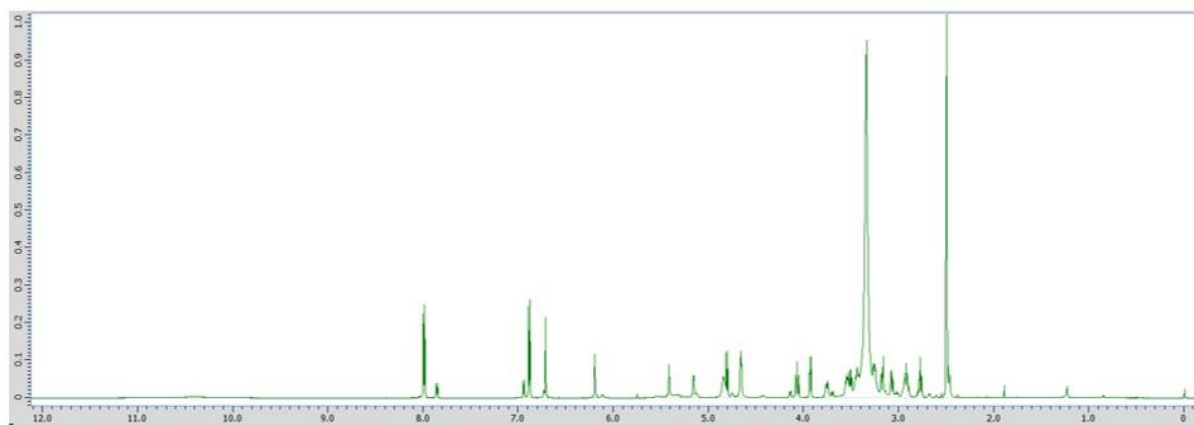

**Figure S31.**  $^1\text{H}$ -NMR (600MHz,  $\text{DMSO-}d_6$ ) spectrum of compound **11**

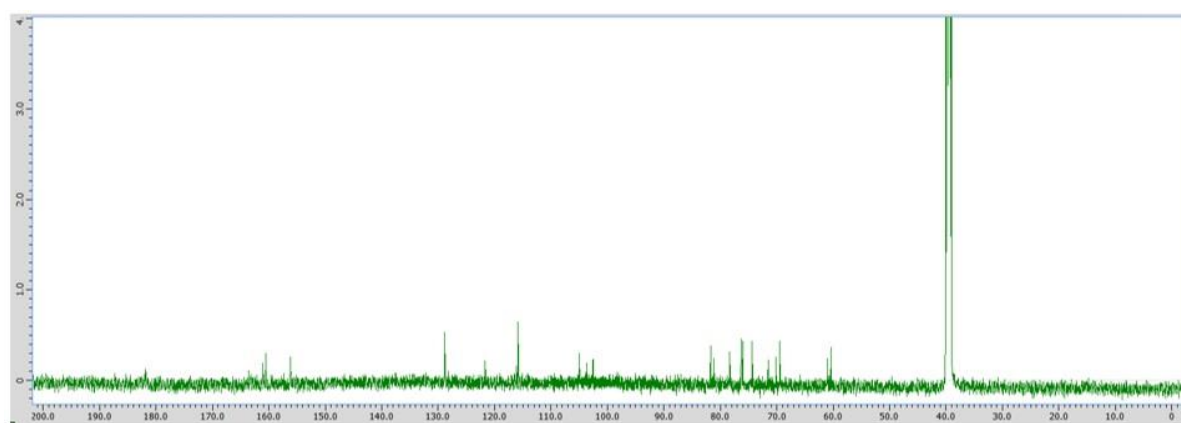

**Figure S32.**  $^{13}\text{C}$ -NMR (150MHz,  $\text{DMSO-}d_6$ ) spectrum of compound **11**

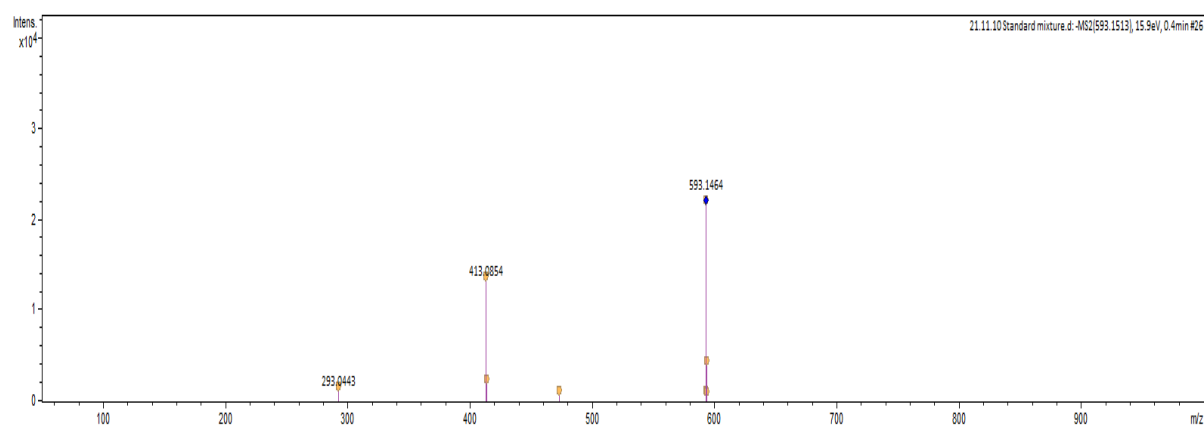

**Figure S33.** ESI/LTQ-Orbitrap-HRMS spectrum of compound **11** (negative mode)

**Table S1.** Recovery of compounds (1- 11) for three different spiked concentrations (5, 25, and 50 µg/mL).

| Compound | Spiked concentration<br>(µg/mL) | Recovery rate<br>(%) |
|----------|---------------------------------|----------------------|
| 1        | 5                               | 95.42                |
|          | 25                              | 95.03                |
|          | 50                              | 99.48                |
| 2        | 5                               | 98.23                |
|          | 25                              | 100.26               |
|          | 50                              | 103.78               |
| 3        | 5                               | 93.69                |
|          | 25                              | 97.04                |
|          | 50                              | 98.98                |
| 4        | 5                               | 102.83               |
|          | 25                              | 101.74               |
|          | 50                              | 103.27               |
| 5        | 5                               | 95.99                |
|          | 25                              | 94.64                |
|          | 50                              | 96.33                |
| 6        | 5                               | 98.68                |
|          | 25                              | 97.92                |
|          | 50                              | 98.12                |
| 7        | 5                               | 97.70                |
|          | 25                              | 98.00                |
|          | 50                              | 95.69                |
| 8        | 5                               | 103.89               |
|          | 25                              | 98.26                |
|          | 50                              | 98.75                |
| 9        | 5                               | 104.51               |
|          | 25                              | 97.22                |
|          | 50                              | 96.82                |
| 10       | 5                               | 99.65                |
|          | 25                              | 98.34                |
|          | 50                              | 102.05               |
| 11       | 5                               | 95.79                |
|          | 25                              | 95.06                |
|          | 50                              | 94.80                |

**Table S2.** Robustness of compounds (1-11) under various analytical conditions (flow rate, column temp., and solvent modifier concentration).

| Compound | Condition          |      | Capacity Factor (K') | Resolution (Rs) | Theoretical plate (N) |
|----------|--------------------|------|----------------------|-----------------|-----------------------|
| 1        | Flow rate (mL/min) | 0.9  | 3.83                 | 9.25            | 14815.44              |
|          |                    | 1.0  | 4.02                 | 9.22            | 11952.50              |
|          |                    | 1.1  | 5.16                 | 8.84            | 9082.20               |
|          | Column temp. (°C)  | 20   | 4.11                 | 8.89            | 11097.75              |
|          |                    | 25   | 4.02                 | 9.22            | 11952.50              |
|          |                    | 30   | 3.75                 | 8.14            | 10291.55              |
|          | Acetic acid (%)    | 0.05 | 4.00                 | 8.78            | 12133.57              |
|          |                    | 0.1  | 4.02                 | 9.22            | 11952.50              |
|          |                    | 0.15 | 3.99                 | 8.00            | 10153.73              |
| 2        | Flow rate (mL/min) | 0.9  | 2.26                 | 4.58            | 5319.16               |
|          |                    | 1.0  | 2.35                 | 4.69            | 5679.13               |
|          |                    | 1.1  | 3.04                 | 5.09            | 5312.66               |
|          | Column temp. (°C)  | 20   | 2.41                 | 5.15            | 5245.97               |
|          |                    | 25   | 2.35                 | 4.69            | 5679.13               |
|          |                    | 30   | 2.16                 | 4.03            | 3817.59               |
|          | Acetic acid (%)    | 0.05 | 2.33                 | 4.03            | 4502.03               |
|          |                    | 0.1  | 2.35                 | 4.69            | 5679.13               |
|          |                    | 0.15 | 2.32                 | 4.07            | 3610.35               |
| 3        | Flow rate (mL/min) | 0.9  | 6.21                 | 0.84            | 15951.69              |
|          |                    | 1.0  | 6.18                 | 0.63            | 16486.56              |
|          |                    | 1.1  | 5.90                 | 0.67            | 12203.82              |
|          | Column temp. (°C)  | 20   | 5.81                 | 1.12            | 16092.73              |
|          |                    | 25   | 6.18                 | 0.63            | 16486.56              |
|          |                    | 30   | 5.86                 | 0.46            | 12356.34              |
|          | Acetic acid (%)    | 0.05 | 6.12                 | 0.76            | 14953.11              |
|          |                    | 0.1  | 6.18                 | 0.63            | 16486.56              |
|          |                    | 0.15 | 6.07                 | 0.83            | 17257.66              |
| 4        | Flow rate (mL/min) | 0.9  | 1.50                 | 2.78            | 4255.21               |
|          |                    | 1.0  | 1.54                 | 2.62            | 3739.36               |
|          |                    | 1.1  | 2.00                 | 2.94            | 4231.45               |
|          | Column temp. (°C)  | 20   | 1.54                 | 3.10            | 4697.52               |
|          |                    | 25   | 1.54                 | 2.62            | 3739.36               |
|          |                    | 30   | 1.45                 | 3.42            | 4399.98               |
|          | Acetic acid (%)    | 0.05 | 1.51                 | 2.71            | 2283.50               |
|          |                    | 0.1  | 1.54                 | 2.62            | 3739.36               |
|          |                    | 0.15 | 1.49                 | 2.71            | 2837.21               |
| 5        | Flow rate (mL/min) | 0.9  | 5.99                 | 0.86            | 19651.73              |
|          |                    | 1.0  | 6.53                 | 1.69            | 25316.86              |
|          |                    | 1.1  | 7.44                 | 1.90            | 24017.11              |
|          | Column temp. (°C)  | 20   | 6.52                 | 1.44            | 21431.01              |
|          |                    | 25   | 6.53                 | 1.69            | 25316.86              |
|          |                    | 30   | 6.30                 | 1.69            | 22284.73              |
|          | Acetic acid (%)    | 0.05 | 6.42                 | 1.29            | 17793.80              |
|          |                    | 0.1  | 6.53                 | 1.69            | 25316.86              |
|          |                    | 0.15 | 6.38                 | 1.46            | 21821.53              |
| 6        | Flow rate          | 0.9  | 5.24                 | 2.12            | 18254.12              |

|    |                       |      |      |      |          |
|----|-----------------------|------|------|------|----------|
|    | (mL/min)              | 1.0  | 5.72 | 2.32 | 17529.36 |
|    |                       | 1.1  | 5.38 | 2.28 | 18952.07 |
|    | Column temp.<br>(°C)  | 20   | 5.97 | 2.41 | 16854.21 |
|    |                       | 25   | 5.89 | 2.22 | 15478.72 |
|    |                       | 30   | 5.81 | 2.61 | 14998.34 |
|    | Acetic acid<br>(%)    | 0.05 | 5.63 | 2.08 | 16952.49 |
|    |                       | 0.1  | 5.66 | 2.11 | 17254.77 |
|    |                       | 0.15 | 5.59 | 1.97 | 17970.20 |
|    | Flow rate<br>(mL/min) | 0.9  | 5.18 | 3.83 | 44078.09 |
|    |                       | 1.0  | 5.62 | 4.93 | 36975.44 |
|    |                       | 1.1  | 5.44 | 5.55 | 45708.00 |
|    | Column temp.<br>(°C)  | 20   | 5.63 | 4.29 | 40794.16 |
|    |                       | 25   | 5.62 | 4.93 | 36975.44 |
|    |                       | 30   | 5.38 | 4.31 | 32303.30 |
|    | Acetic acid<br>(%)    | 0.05 | 5.53 | 4.45 | 40059.85 |
|    |                       | 0.1  | 5.62 | 4.93 | 36975.44 |
|    |                       | 0.15 | 5.49 | 4.48 | 36492.46 |
| 7  | Flow rate<br>(mL/min) | 0.9  | 0.93 | -    | 914.75   |
|    |                       | 1.0  | 0.96 | -    | 1445.01  |
|    |                       | 1.1  | 1.34 | -    | 1239.98  |
|    | Column temp.<br>(°C)  | 20   | 0.98 | -    | 1412.95  |
|    |                       | 25   | 0.96 | -    | 1445.01  |
|    |                       | 30   | 0.86 | -    | 1395.60  |
|    | Acetic acid<br>(%)    | 0.05 | 0.96 | -    | 1549.21  |
|    |                       | 0.1  | 0.96 | -    | 1445.01  |
|    |                       | 0.15 | 0.94 | -    | 1230.82  |
| 8  | Flow rate<br>(mL/min) | 0.9  | 4.33 | 2.11 | 4380.67  |
|    |                       | 1.0  | 4.60 | 2.54 | 6619.45  |
|    |                       | 1.1  | 5.94 | 3.19 | 14680.06 |
|    | Column temp.<br>(°C)  | 20   | 4.68 | 2.29 | 5445.13  |
|    |                       | 25   | 4.60 | 2.54 | 6619.45  |
|    |                       | 30   | 4.32 | 2.08 | 3645.67  |
|    | Acetic acid<br>(%)    | 0.05 | 4.57 | 2.36 | 5489.64  |
|    |                       | 0.1  | 4.60 | 2.54 | 6619.45  |
|    |                       | 0.15 | 4.55 | 2.33 | 6153.84  |
| 9  | Flow rate<br>(mL/min) | 0.9  | 5.54 | 1.21 | 19685.29 |
|    |                       | 1.0  | 6.05 | 1.62 | 23618.31 |
|    |                       | 1.1  | 5.74 | 0.97 | 19184.99 |
|    | Column temp.<br>(°C)  | 20   | 6.02 | 1.39 | 18714.24 |
|    |                       | 25   | 6.05 | 1.62 | 23618.31 |
|    |                       | 30   | 5.76 | 1.21 | 25192.04 |
|    | Acetic acid<br>(%)    | 0.05 | 5.93 | 1.03 | 17343.23 |
|    |                       | 0.1  | 6.05 | 1.62 | 23618.31 |
|    |                       | 0.15 | 5.89 | 1.49 | 17306.04 |
| 10 | Flow rate<br>(mL/min) | 0.9  | 0.61 | 0.61 | 17552.67 |
|    |                       | 1.0  | 0.81 | 0.81 | 20352.39 |
|    |                       | 1.1  | 0.80 | 0.80 | 18181.19 |
|    | Column temp.<br>(°C)  | 20   | 5.27 | 0.60 | 15417.80 |
|    |                       | 25   | 5.75 | 0.81 | 20352.39 |
|    |                       | 30   | 5.58 | 0.93 | 17306.53 |
|    | Acetic acid           | 0.05 | 0.61 | 5.64 | 15980.79 |
|    |                       |      |      |      |          |
|    |                       |      |      |      |          |
| 11 | Flow rate<br>(mL/min) | 0.9  | 0.61 | 0.61 | 17552.67 |
|    |                       | 1.0  | 0.81 | 0.81 | 20352.39 |
|    |                       | 1.1  | 0.80 | 0.80 | 18181.19 |
|    | Column temp.<br>(°C)  | 20   | 5.27 | 0.60 | 15417.80 |
|    |                       | 25   | 5.75 | 0.81 | 20352.39 |
|    |                       | 30   | 5.58 | 0.93 | 17306.53 |
|    | Acetic acid           | 0.05 | 0.61 | 5.64 | 15980.79 |
|    |                       |      |      |      |          |
|    |                       |      |      |      |          |

|     |      |      |      |          |
|-----|------|------|------|----------|
| (%) | 0.1  | 0.81 | 5.75 | 20352.39 |
|     | 0.15 | 0.80 | 5.60 | 21229.22 |

---
